# Supplementary material for: Photopolymerization of Pluronic F127 diacrylate: a colloid-templated polymerization
Source: Royal Society of Chemistry journal article supplement (doi:10.1039/c1sm05095h), 2011-01-01
Supplement: c1sm05095h.pdf [file c1sm05095h.pdf]

## Electronic Supplementary Information

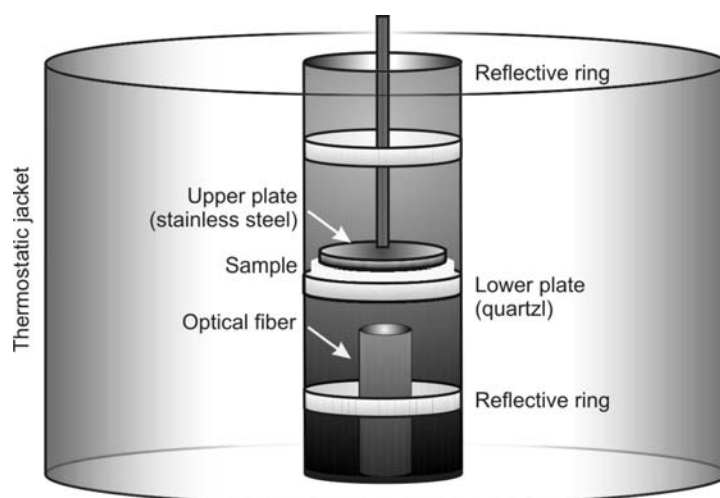

**Figure 1SI.** Scheme of the assembly used for performing photopolymerization experiments; in a Bohlin rheometer the lower plate was replaced by a transparent quartz window. Two Teflon white inserts (reflective rings) were employed to minimize the loss of light from the reaction chamber.

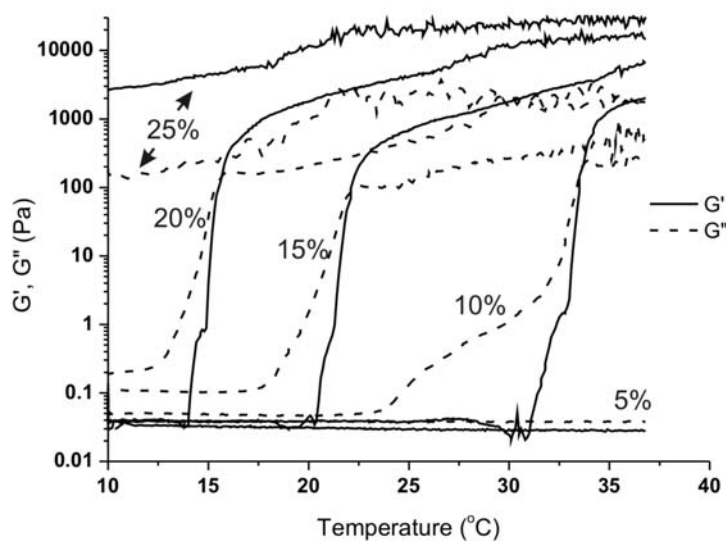

**Figure 2SI.** Storage ( $G'$ ) and loss ( $G''$ ) moduli recorded at a stress of 10 Pa and a frequency of 1 Hz for F127DA solutions in deionized water at different concentrations.

F127DA at 10°C

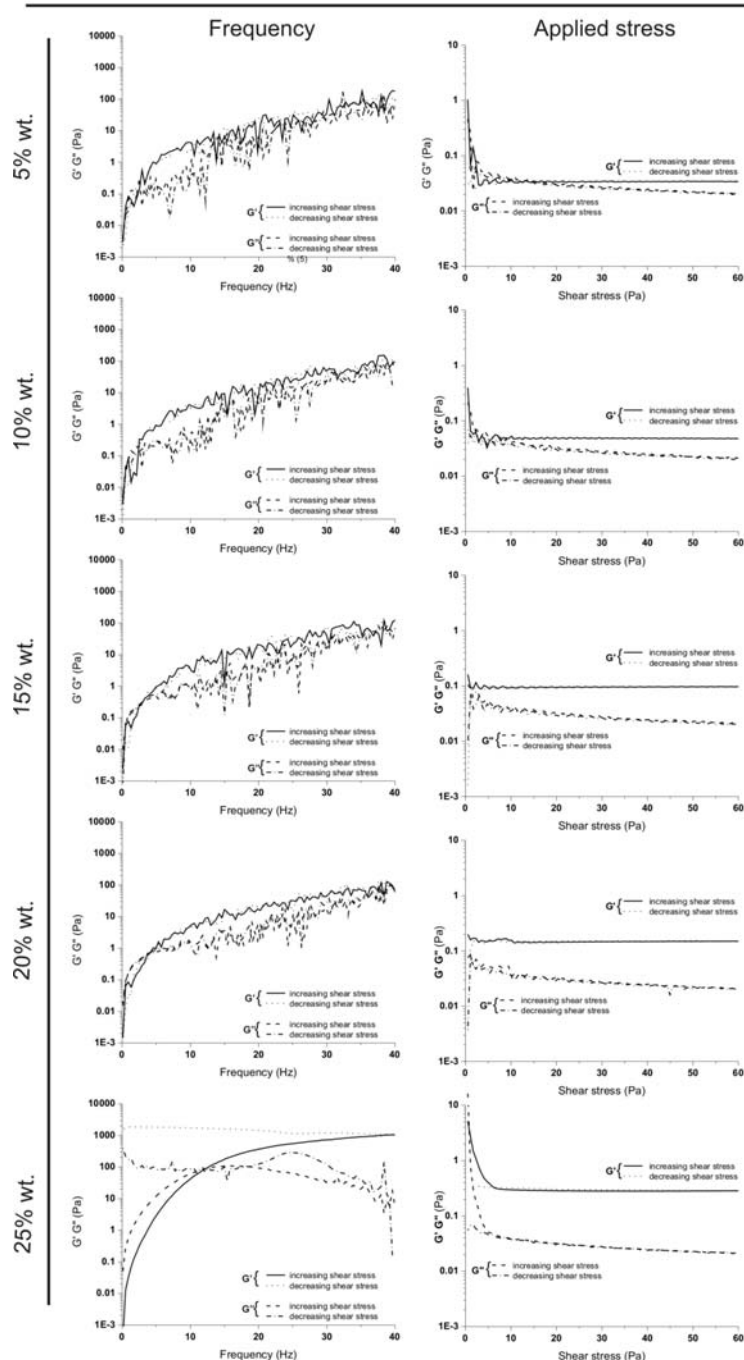

**Figure 3SI.** Frequency and shear stress dependence of storage ( $G'$ ) and loss ( $G''$ ) moduli as a function of concentration for F127DA in deionized water at a temperature of 10°C. The data were obtained subjecting the samples to increasing and then decreasing frequency and stress. *Left:* Stress = 10 Pa. *Right:* frequency = 1 Hz. Please realize that  $G'$  or  $G''$  values below  $10^{-1}$  Pa are purely indicative since they are substantially out of the measurable range of the rheometer utilized. At 25%wt. F127DA showed a rather clear gel point in the frequency sweep and a gel-like behaviour acquired at high frequency, which suggests an anti-thixotropic behaviour. The border-line nature of this sample is confirmed that in temperature scans (Figure 2SI) it showed  $G' > G''$  at all temperatures.

F127DA at 37°C

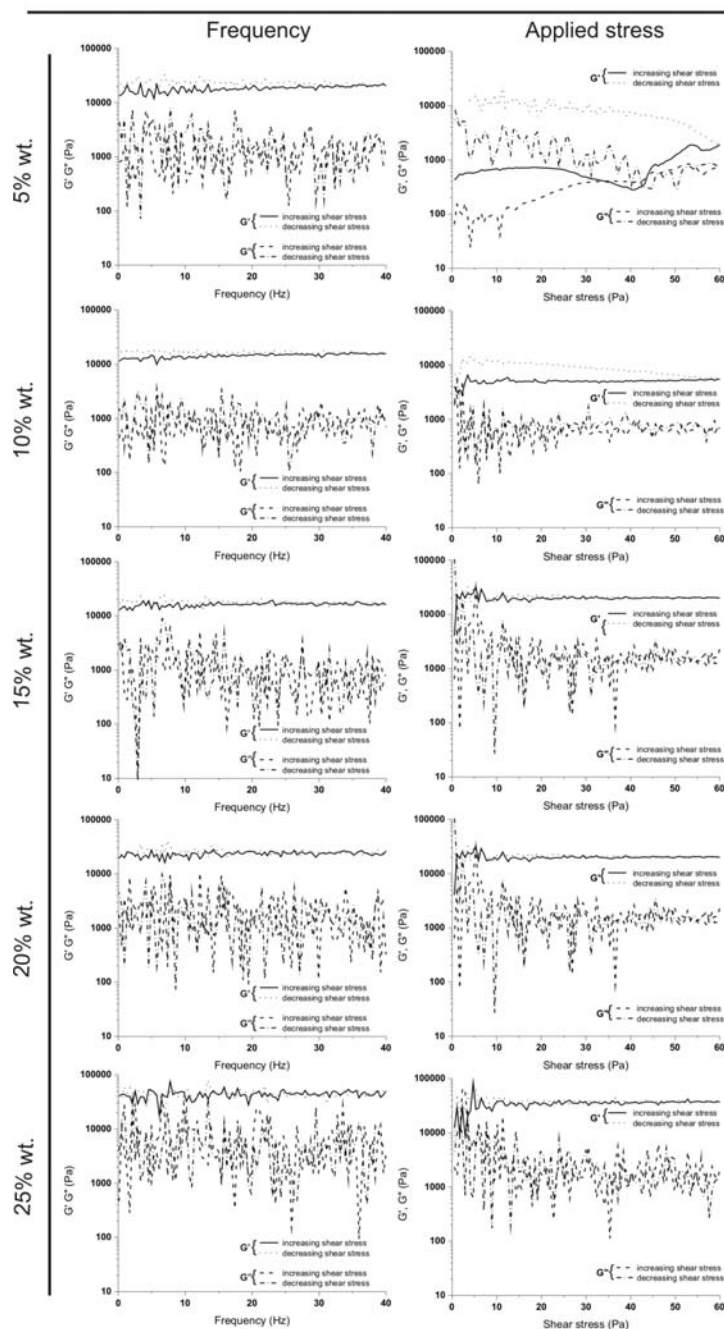

**Figure 4SI.** Frequency and shear stress dependence of storage ( $G'$ ) and loss ( $G''$ ) moduli as a function of concentration for F127DA in deionized water at a temperature of 37°C. *Left:* stress = 10 Pa. *Right:* frequency = 1 Hz. Please realize that  $G'$  or  $G''$  values below  $10^{-1}$  Pa are purely indicative since they are substantially out of the measurable range of the rheometer utilized.

At 5%wt. F127DA showed a stress dependent behaviour upon increasing stress, which was substantially lost in the decreasing stress sweep.

The 5% wt. polymer solution does not appear to gel by the end of the temperature scan (Figure 2SI), whereas gels are recorded in the amplitude and frequency sweeps at 37°C. This can be due to either a kinetic factor, due to the shorter time spent at that temperature during the temperature scan (the samples for stress and frequency sweeps were first equilibrated for 10 minutes at 37°C, while the temperature scan is a dynamic measurement), but the influence of water evaporation in the stress sweep cannot be completely ruled out.

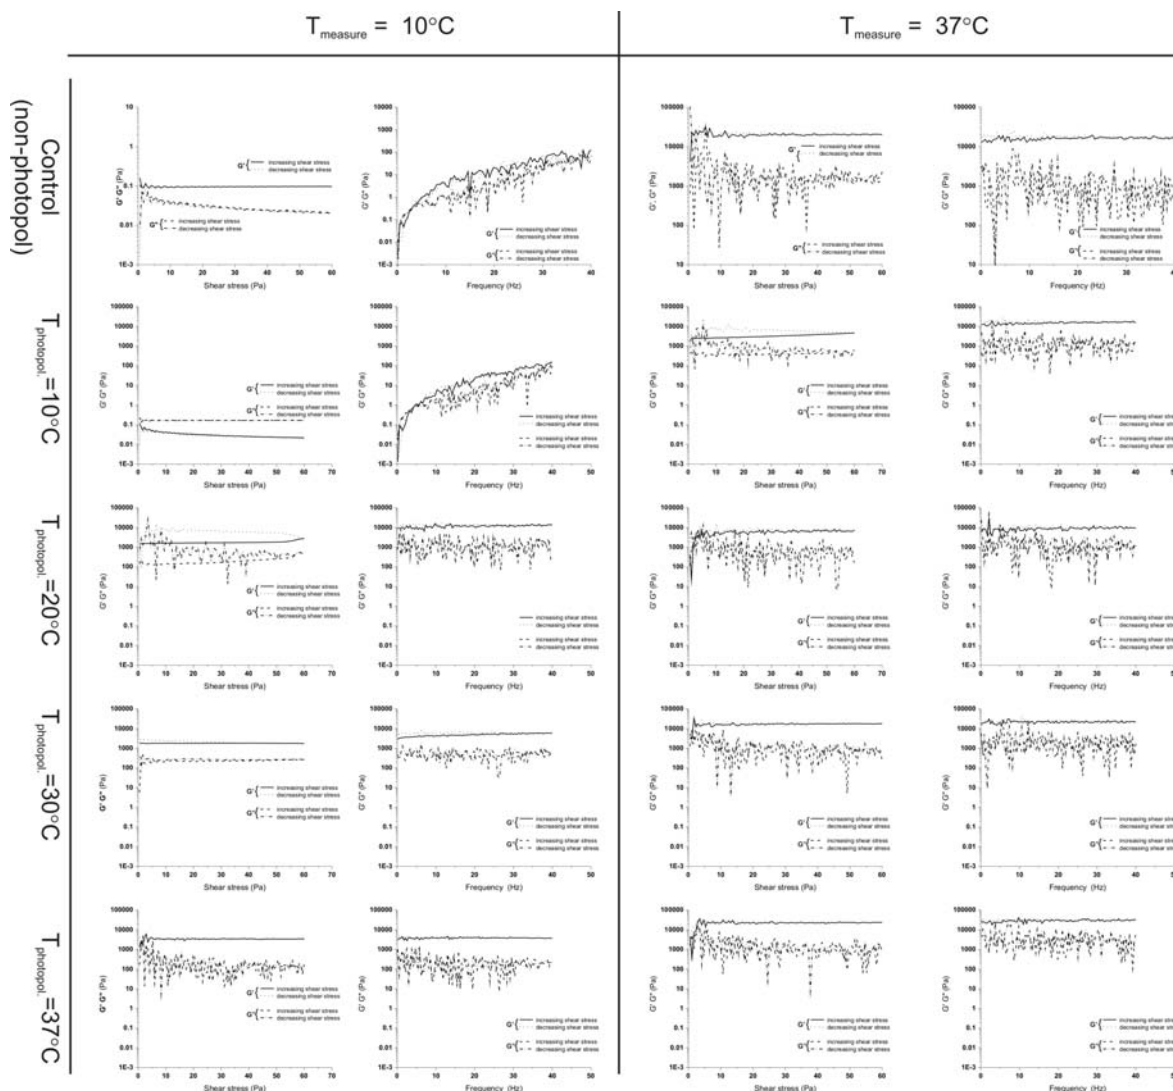

**Figure 5SI.** Frequency and shear stress dependence of storage ( $G'$ ) and loss ( $G''$ ) moduli for F127DA photopolymerized at a concentration of 15% wt., as a function of the temperature at photopolymerization (vertical axis) and of the temperature during the rheological measurement. Samples polymerized at 20°C (“viscous gel”→gel), 30 and 37°C (gel→gel) retained an elastic gel behaviour also when cooled at 10°C. Stress = 10 Pa in the frequency sweeps, frequency = 1 Hz in the stress sweeps.

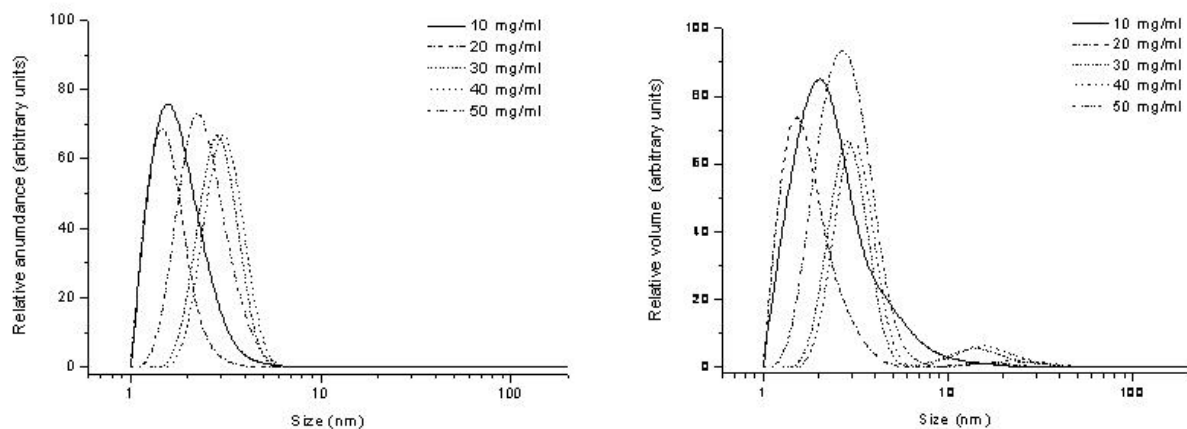

**Figure 6SI.** Number (left) and volume (right) size distribution of a dispersion of Pluronic F127DA photopolymerised at a concentration of 5% wt. and at a temperature of 37°C. The intensity size distributions of the 50 mg/mL samples are reported in Figure 6, left.
